# Supplementary figures and images for: Long noncoding RNA PVT1 promotes tumor growth and predicts poor prognosis in patients with diffuse large B‐cell lymphoma
Source: PubMed Central journal article supplement — Cancer Commun (Lond). 2020 Jul 29;40(10):551–5. doi: 10.1002/cac2.12073 (PMC7571398; doi:10.1002/cac2.12073), 2020-07-29

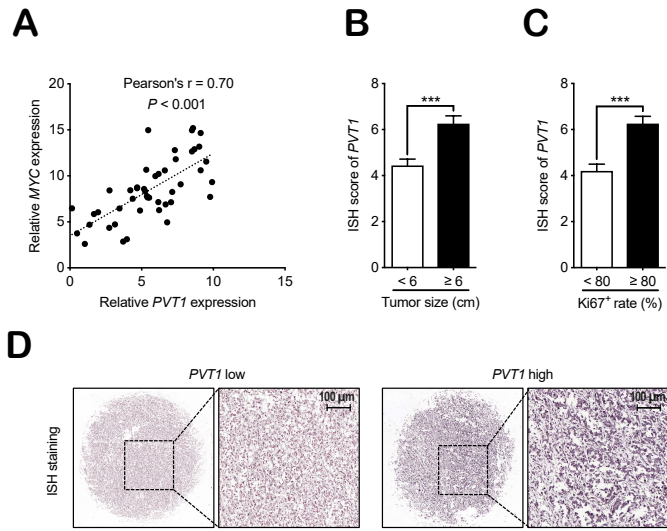

Supplement: CAC2-40-551-s002.pdf [file CAC2-40-551-s002.pdf]

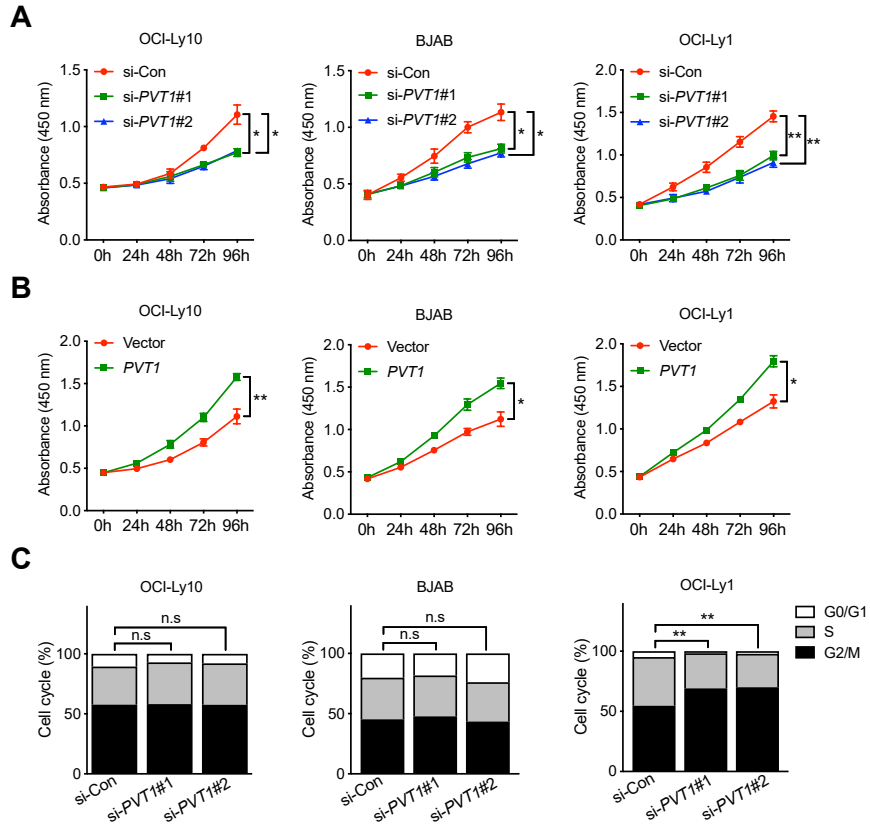

Supplement: CAC2-40-551-s003.pdf [file CAC2-40-551-s003.pdf]

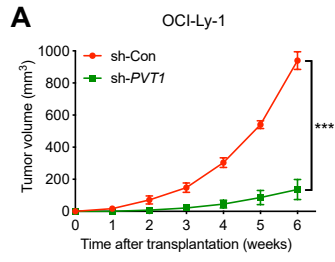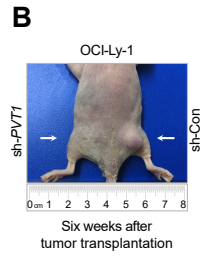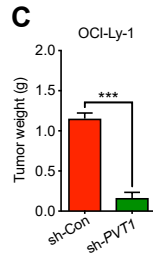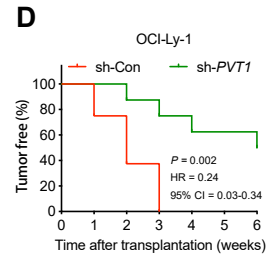

Supplement: CAC2-40-551-s004.pdf [file CAC2-40-551-s004.pdf]
